# Supplementary material for: Label-Free Creatinine Optical Sensing Using Molecularly Imprinted Titanium Dioxide-Polycarboxylic Acid Hybrid Thin Films: A Preliminary Study for Urine Sample Analysis
Source: MDPI journal article supplement (doi:10.3390/chemosensors9070185), 2021-07-17
Supplement: s1 [file s1]

*Supporting information*

# Label-Free Creatinine Optical Sensing Using Molecularly Imprinted Titanium Dioxide-Polycarboxylic Acid Hybrid Thin Films: A Preliminary Study for Urine Sample Analysis

Seung-Woo Lee <sup>1,\*</sup>, Soad Ahmed <sup>1</sup>, Tao Wang <sup>1</sup>, Yeawon Park <sup>1</sup>, Sota Matsuzaki <sup>1</sup>, Shinichi Tatsumi <sup>1</sup>, Shigekiyo Matsumoto <sup>2</sup>, Sergiy Korposh <sup>3</sup> and Steve James <sup>4</sup>

<sup>1</sup> Graduate School of Environmental Engineering, The University of Kitakyushu, 1-1 Hibikino, Kitakyushu 808-0135, Japan; z8daa401@eng.kitakyu-u.ac.jp (S.A.); t-wan@kitakyu-u.ac.jp (T.W.); b0daa001@eng.kitakyu-u.ac.jp (Y.P.); sota8936@icloud.com (S.M.); s-tatsumi@kitakyu-u.ac.jp (S.T.)

<sup>2</sup> Department of Anesthesiology, Faculty of Medicine, Oita University, 1-1 Idaigaoka, Yufu-shi, Oita 879-5593, Japan; sigekiyo@oita-u.ac.jp

<sup>3</sup> Department of Electrical and Electronic Engineering, University of Nottingham, Nottingham NG7 2RD, UK; s.korposh@nottingham.ac.uk

<sup>4</sup> Engineering Photonics, School of Aerospace, Transport and Manufacturing, Cranfield University, Cranfield, Bedford MK43 0AL, UK; s.w.james@cranfield.ac.uk

\* Correspondence: leesw@kitakyu-u.ac.jp; Tel.: +81-93-695-3293

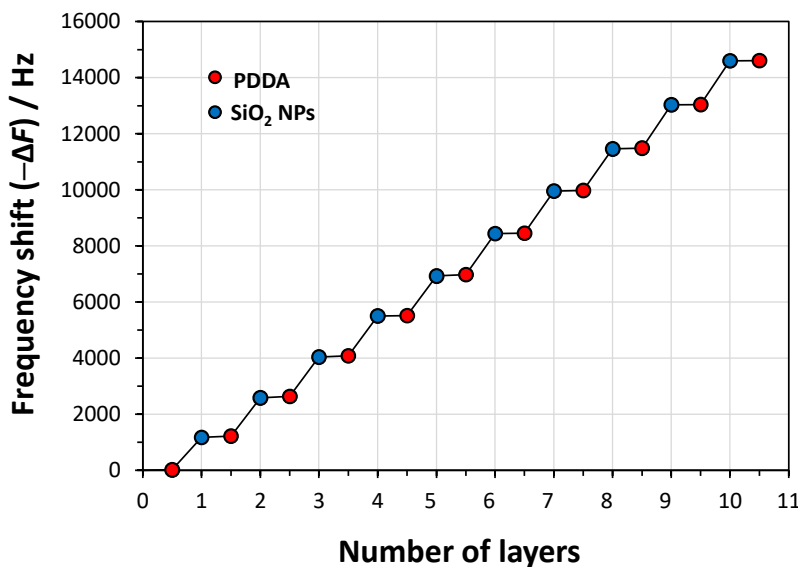

**Figure S1.** 9-MHz QCM frequency shifts measured during the same LbL electrostatic self-assembly of PDDA and SiO<sub>2</sub> NPs, showing an average frequency shift of  $28 \pm 17$  Hz and  $1430 \pm 115$  Hz per cycle of PDDA and SiO<sub>2</sub> NPs, respectively.

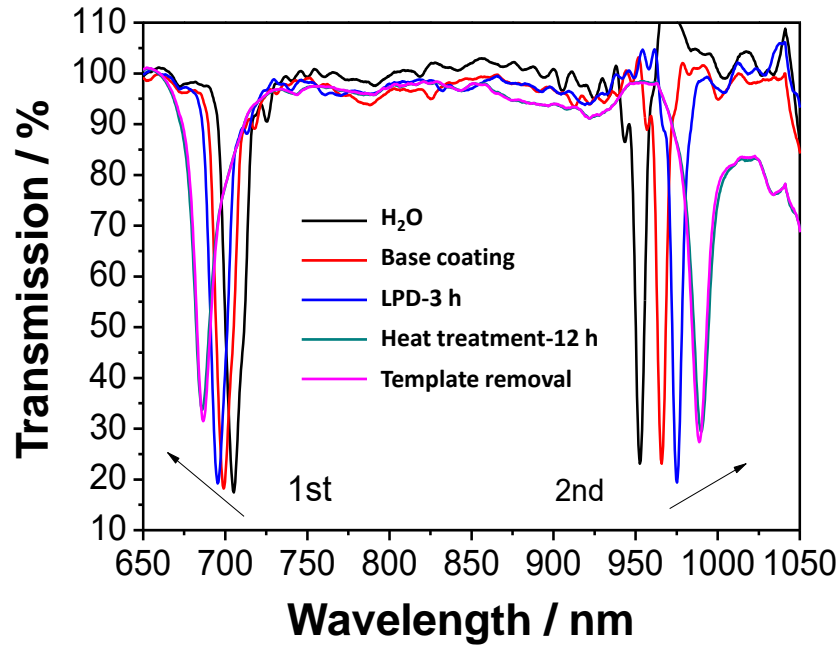

**Figure S2.** Changes in the TS of the LPG with a base coating measured in water before and after deposition of the PAA/TiO<sub>2</sub> (1 mM PAA) film for 3 h, after heat treatment at 60°C for 12 h, and after template removal.

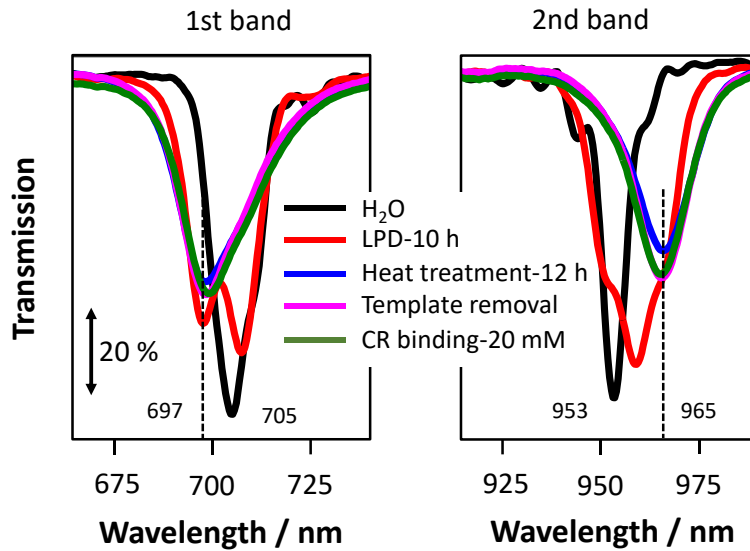

**Figure S3.** Changes in the TS of the LPG coated without a base coating measured in water before and after deposition of the CR@PAA/TiO<sub>2</sub> (2 mM CR and 6 mM PAA) film for 10 h, after heat treatment at 60°C (humidity 90%) for 12 h, and after template removal by HCl washing, subsequently followed by CR rebinding using a solution of 20 mM CR at 6.8 pH.

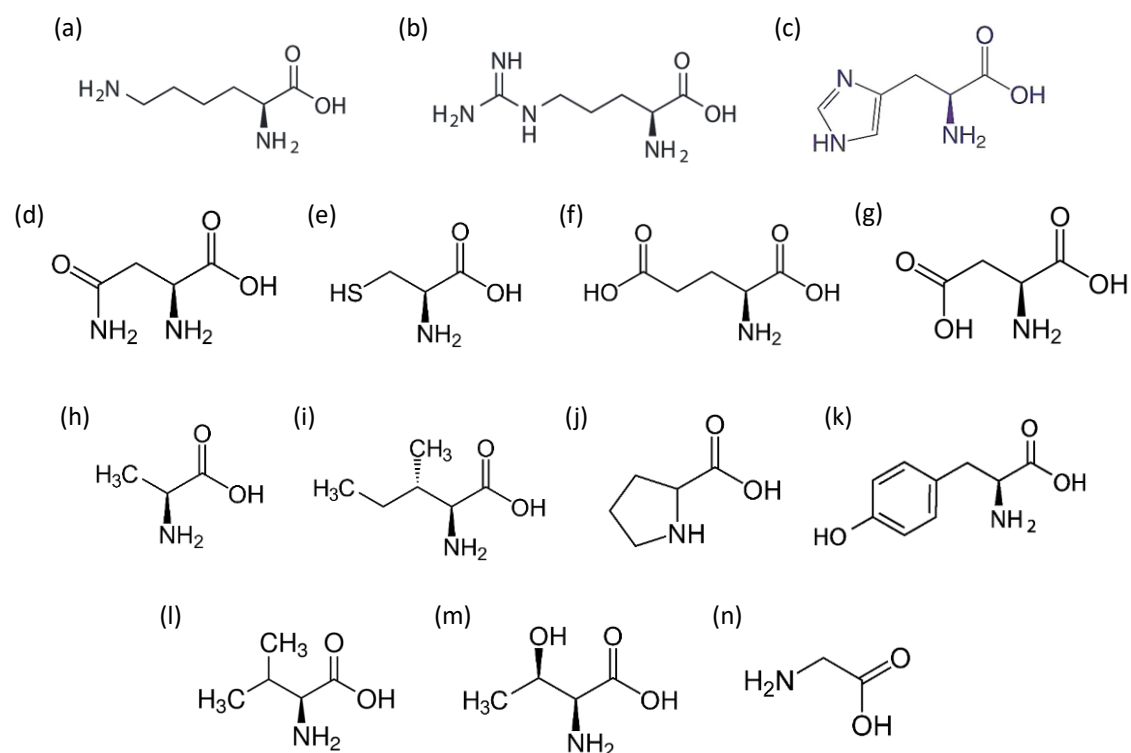

**Figure S4.** Chemical structures of amino acid guest molecules used in this study: (a) lysine, (b) arginine, (c) histidine, (d) asparagine, (e) cysteine (f) glutamic acid, (g) aspartic acid, (h) alanine, (i) isoleucine, (j) proline, (k) tyrosine, (l) valine, (m) threonine, and (n) glycine.

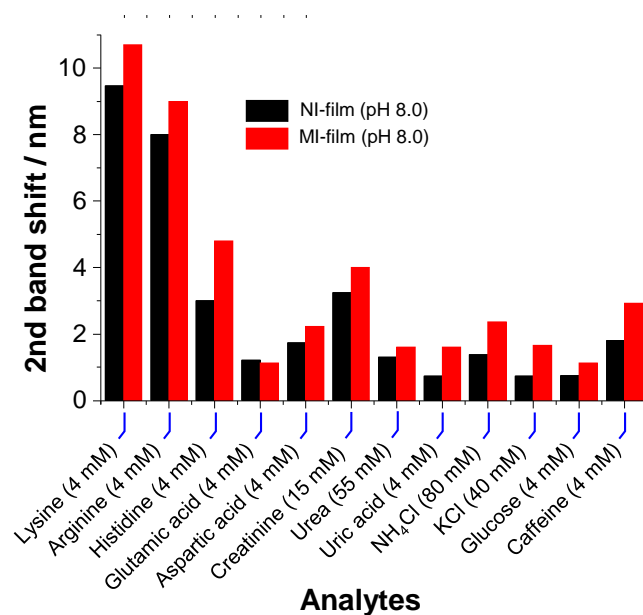

**Figure S5.** Comparison of the wavelength shifts of the second LPD band upon exposure of the NI and MI films to the CR and guest molecules at pH 8.0.

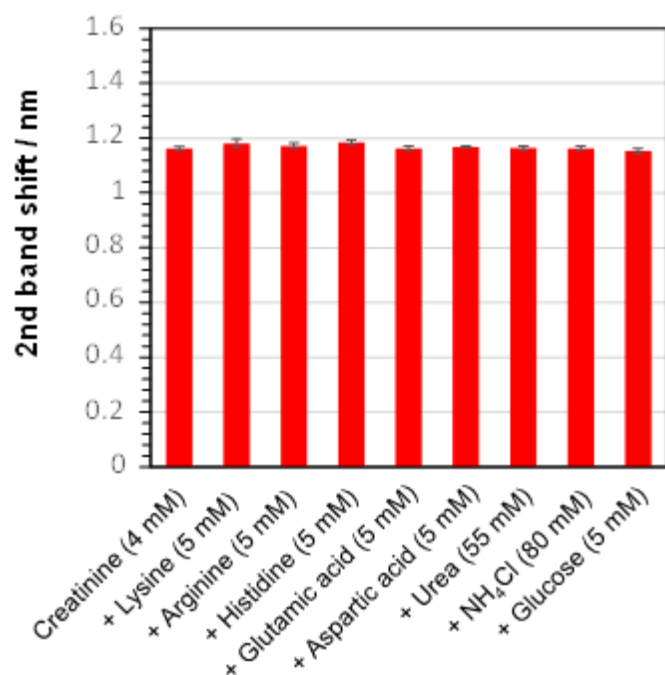

**Figure S6.** Comparison of the wavelength shifts ( $n = 3$ ) of the second LPG band upon exposure of the MI film to CR (4 mM) or a binary mixture including CR (4 mM) at pH 6.8.

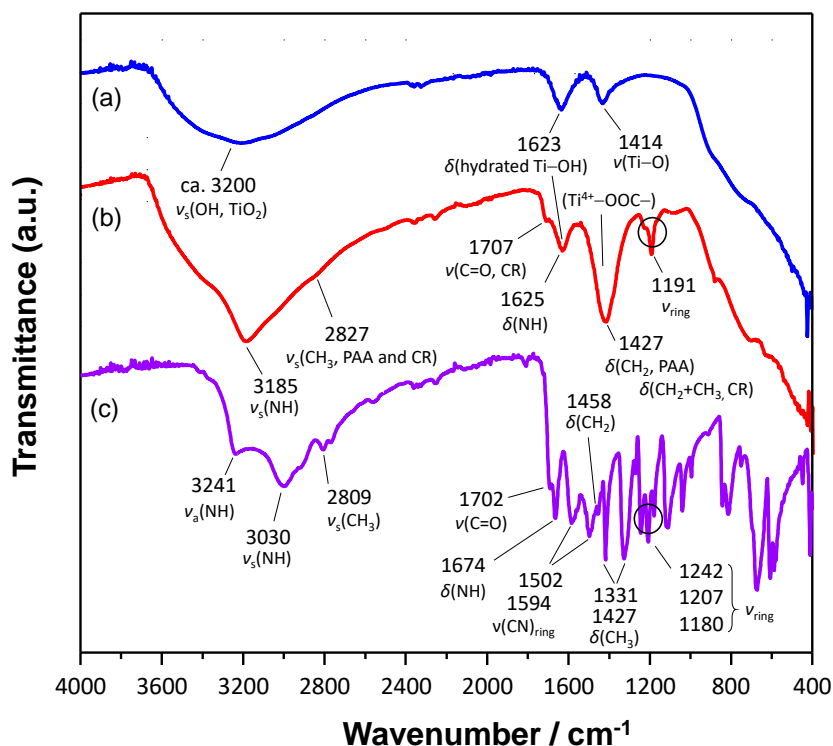

**Figure S7.** ATR-FTIR spectra of the solid samples of (a) pure TiO<sub>2</sub>, (b) CR@PAA/TiO<sub>2</sub>, and (c) pristine CR.

**Table S1.** Molecular properties of guest molecules including amino acids used in this study [1].

| Compound      | Molecular weight<br>(g mol <sup>-1</sup> ) | Molecular formula                                            | Expressive formula                                                                   | pK <sub>a1</sub> | pK <sub>a2</sub> | N <sup>a</sup> |
|---------------|--------------------------------------------|--------------------------------------------------------------|--------------------------------------------------------------------------------------|------------------|------------------|----------------|
| Lysine        | 146.19                                     | C <sub>6</sub> H <sub>14</sub> N <sub>2</sub> O <sub>2</sub> | H <sub>2</sub> N-(CH <sub>2</sub> ) <sub>4</sub> -CH(NH <sub>2</sub> )-COOH          | 2.74             | 10.3             | 2              |
| Arginine      | 174.20                                     | C <sub>6</sub> H <sub>14</sub> N <sub>4</sub> O <sub>2</sub> | HN=C(NH <sub>2</sub> )-NH-(CH <sub>2</sub> ) <sub>3</sub> -CH(NH <sub>2</sub> )-COOH | 2.41             | 12.4             | 4              |
| Histidine     | 155.15                                     | C <sub>6</sub> H <sub>9</sub> N <sub>3</sub> O <sub>2</sub>  | NH-CH=N-CH=C-CH <sub>2</sub> -CH(NH <sub>2</sub> )-COOH                              | 1.85             | 9.44             | 3              |
| Asparagine    | 132.12                                     | C <sub>4</sub> H <sub>7</sub> NO <sub>4</sub>                | H <sub>2</sub> N(O)C-CH <sub>2</sub> -CH(NH <sub>2</sub> )-COOH                      | 2.00             | 8.43             | 1              |
| Creatinine    | 113.12                                     | C <sub>4</sub> H <sub>7</sub> N <sub>3</sub> O               | Hetero cyclic                                                                        | 4.96             | 9.21             | 3              |
| Cysteine      | 121.16                                     | C <sub>3</sub> H <sub>7</sub> NO <sub>2</sub> S              | HS-CH <sub>2</sub> -CH(NH <sub>2</sub> )-COOH                                        | 2.35             | 9.05             | 1              |
| Glutamic acid | 147.13                                     | C <sub>5</sub> H <sub>9</sub> NO <sub>4</sub>                | HOOC-(CH <sub>2</sub> ) <sub>2</sub> -CH(NH <sub>2</sub> )-COOH                      | 1.88             | 9.54             | 1              |
| Aspartic acid | 133.11                                     | C <sub>4</sub> H <sub>7</sub> NO <sub>4</sub>                | HOOCCH <sub>2</sub> CH(COOH)NH <sub>2</sub>                                          | 1.99             | 9.90             | 1              |
| Alanine       | 89.09                                      | C <sub>3</sub> H <sub>7</sub> NO <sub>2</sub>                | CH <sub>3</sub> -CH(NH <sub>2</sub> )-COOH                                           | 2.47             | 9.48             | 1              |
| Isoleucine    | 131.17                                     | C <sub>6</sub> H <sub>13</sub> NO <sub>2</sub>               | CH <sub>3</sub> -CH <sub>2</sub> -CH(CH <sub>3</sub> )-CH(NH <sub>2</sub> )-COOH     | 2.79             | 9.59             | 1              |
| Proline       | 115.13                                     | C <sub>5</sub> H <sub>9</sub> NO <sub>2</sub>                | NH-(CH <sub>2</sub> ) <sub>3</sub> -CH-COOH                                          | 1.94             | 11.3             | 1              |
| Tyrosine      | 181.19                                     | C <sub>9</sub> H <sub>11</sub> NO <sub>3</sub>               | HO-Ph-CH <sub>2</sub> -CH(NH <sub>2</sub> )-COOH                                     | 2.00             | 9.19             | 1              |
| Valine        | 117.15                                     | C <sub>5</sub> H <sub>11</sub> NO <sub>2</sub>               | (CH <sub>3</sub> ) <sub>2</sub> -CH-CH(NH <sub>2</sub> )-COOH                        | 2.72             | 9.60             | 1              |
| Threonine     | 119.12                                     | C <sub>4</sub> H <sub>9</sub> NO <sub>3</sub>                | CH <sub>3</sub> -CH(OH)-CH(NH <sub>2</sub> )-COOH                                    | 2.21             | 9.00             | 1              |
| Glycine       | 75.07                                      | C <sub>2</sub> H <sub>5</sub> NO <sub>2</sub>                | NH <sub>2</sub> -CH <sub>2</sub> -COOH                                               | 2.31             | 9.24             | 1              |
| Glucose       | 180.16                                     | C <sub>6</sub> H <sub>12</sub> O <sub>6</sub>                | Cyclic                                                                               |                  |                  | 0              |
| Urea          | 60.06                                      | CH <sub>4</sub> N <sub>2</sub> O                             | H <sub>2</sub> N(O)C-NH <sub>2</sub>                                                 |                  |                  | 2              |
| Uric acid     | 168.11                                     | C <sub>5</sub> H <sub>4</sub> N <sub>4</sub> O <sub>3</sub>  | Hetero cyclic                                                                        |                  |                  |                |
| Caffeine      | 194.19                                     | C <sub>8</sub> H <sub>10</sub> N <sub>4</sub> O <sub>2</sub> | Hetero cyclic                                                                        |                  |                  |                |

<sup>a</sup> Number of nitrogen atoms in a molecule.[1] *CRC Handbook of Chemistry and Physics* 97th ed.; Haynes, W.M., Ed.; CRC Press: Boca Raton, FL, 2016; pp. 5–89.
